# Supplementary material
Source: publisher figshare collection journal article supplement (https://acs.figshare.com/ndownloader/files/3966250)
Supplement: Supplementary file 1 [file 3966250]

# Effects of Functionalized Gold Nanoparticle Size on X-ray Attenuation and Substrate Binding Affinity

Ryan D. Ross, Lisa E. Cole, Jennifer M.R. Tilley and Ryan K. Roeder

Department of Aerospace and Mechanical Engineering  
Bioengineering Graduate Program  
University of Notre Dame  
Notre Dame, IN 46556, USA

## SUPPLEMENTARY INFORMATION FOR TABLE 1 AND FIGURE 1

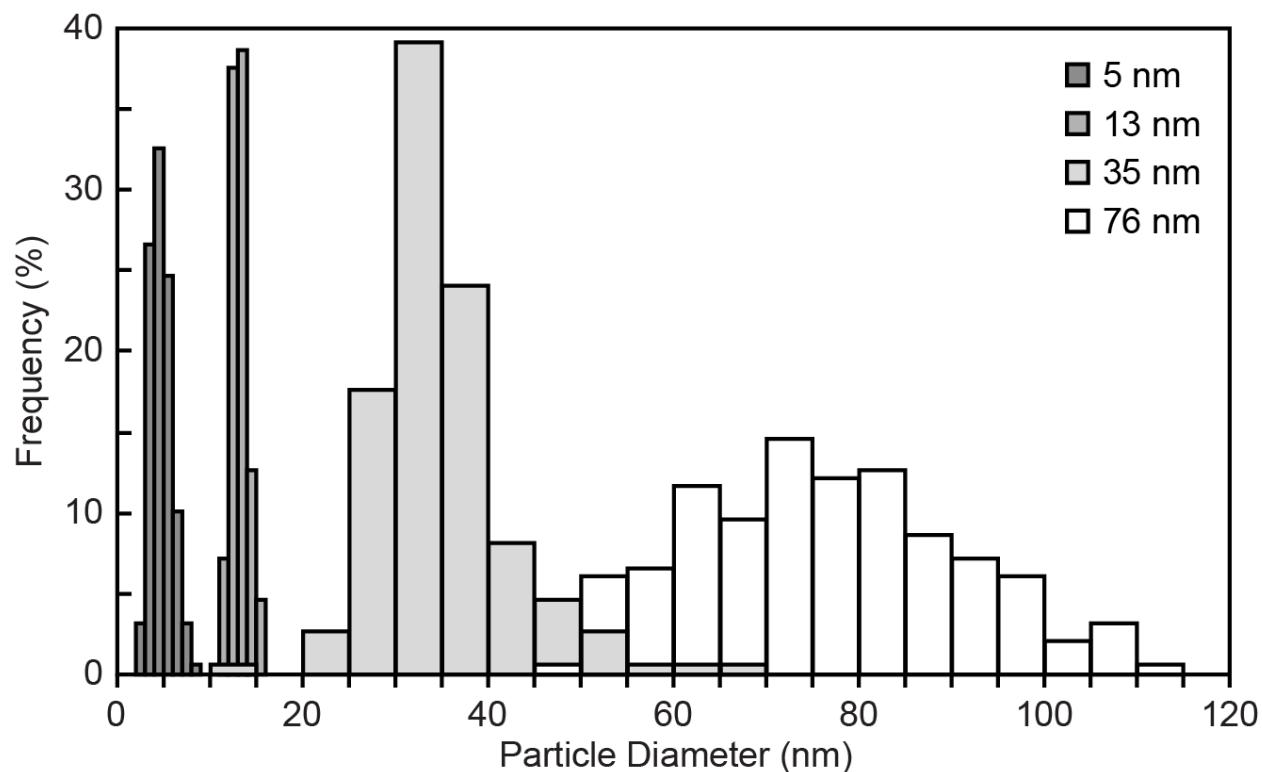

**Figure 1 Supplementary Information.** Particle size distributions for functionalized Au NPs exhibiting a mean particle diameter of 5, 13, 35, or 76 nm were characterized using transmission electron microscopy as described in the Methods. The breadth of the particle size distribution increased with increased mean particle diameter.
